# Supplementary material for: Incidence and Prevalence of Neovascular Age-Related Macular Degeneration in France between 2008 and 2018: The LANDSCAPE Study
Source: PubMed Central journal article supplement — Ophthalmol Sci. 2022 Jan 22;2(1):100114. doi: 10.1016/j.xops.2022.100114 (PMC9562296; doi:10.1016/j.xops.2022.100114), 2022-01-22
Supplement: mmc1.pdf [file mmc1.pdf]

**Supplementary Table 1** Incidence of AMD in the literature in Europe and USA (selected articles were published after the year 2000 and included >500 participants)

| Author, publication date                   | Country, date of data collection | Study design                                                 | Analyzed population                                               | Study follow-up | Incidence (%) |          |                                                                |                                                                 |
|--------------------------------------------|----------------------------------|--------------------------------------------------------------|-------------------------------------------------------------------|-----------------|---------------|----------|----------------------------------------------------------------|-----------------------------------------------------------------|
|                                            |                                  |                                                              |                                                                   |                 | Any AMD       | Late AMD | Neovascular AMD [age group in years]                           | Neovascular AMD annual incidence (%)* [age group in years]      |
| Saunier <i>et al.</i> , 2018 <sup>20</sup> | France<br>2006-2012              | Population aged > 73 years old selected from electoral rolls | 659 participants<br>Mean age: 79.7 years<br>Sex ratio: 37.3% men  | 5-year          | NA            | 8.9      | 4.4                                                            | 0.89<br>[73-79] = 0.83<br>>80 = 0.94                            |
| Joachim <i>et al.</i> , 2015 <sup>12</sup> | Australia<br>2007-2010           | Population aged > 49 years old from Blue Mountain County     | 1149 participants<br>Mean age: 64.3 years<br>Sex ratio: 42.4% men | 15-year         | NA            | 6.8      | 4.4<br>[<60]=0.7<br>[60-69]= 4.8<br>[70-79]=12.9<br>[≥80]=13.8 | 0.29<br>[<60] = 0.0<br>[60-69]= 0.3<br>[70-79]=0.9<br>[≥80]=0.9 |

For: Ophthalmology Science

|                                            |                                  |                                                                                                                                                                         |                                                                       |              |    |     |      |      |
|--------------------------------------------|----------------------------------|-------------------------------------------------------------------------------------------------------------------------------------------------------------------------|-----------------------------------------------------------------------|--------------|----|-----|------|------|
| Varma <i>et al.</i> , 2010 <sup>36</sup>   | USA<br>(California)<br>2004-2008 | Latinos selected by addresses aged > 40 years old in Los Angeles County, USA                                                                                            | 4029 participants<br>Mean age: 54.7 years<br>Sex ratio: 40.0 % men    | 4-year       | NA | 0.2 | 0.1  | 0.03 |
| Fisher <i>et al.</i> , 2016 <sup>44</sup>  | USA<br>2010-2012                 | Population selected by using locally available resources, such as lists of residences, dwellings, and telephone exchanges, aged > 45 years old                          | 3802 participants<br>Mean age: 60.8 years<br>Sex ratio: 46.9% men     | 8-year       | NA | 2.3 | 0.7  | 0.09 |
| Farinha <i>et al.</i> , 2019 <sup>17</sup> | Portugal<br>2016-2017            | Population aged > 55 years old selected on subjects who participated in the analysis to estimate AMD prevalence in Portugal and recruited from the primary health care. | 1616 participants<br>Mean age: (55->85) years<br>Sex ratio: 43.1% men | 6.5-<br>year | NA | 0.8 | 0.44 | 0.06 |

For: Ophthalmology Science

|                                                |                      |                                                                                                                                               |                                                                |        |    |    |      |                                                                                    |
|------------------------------------------------|----------------------|-----------------------------------------------------------------------------------------------------------------------------------------------|----------------------------------------------------------------|--------|----|----|------|------------------------------------------------------------------------------------|
| Geirsdottir <i>et al.</i> , 2012 <sup>15</sup> | Iceland<br>2007-2009 | Hospitalized patients with exudative AMD who started intravitreal ranibizumab treatment from March 2007 to December 2009 aged > 60 years old. | 439 participants<br>Mean age: 79 years<br>Sex ratio: 37.0% men | 2-year | NA | NA | 0.59 | 0.29<br>[60-69]=0.06<br>[70-74]=0.24<br>[75-79]=0.38<br>[80-84]=0.70<br>[≥85]=0.96 |
|------------------------------------------------|----------------------|-----------------------------------------------------------------------------------------------------------------------------------------------|----------------------------------------------------------------|--------|----|----|------|------------------------------------------------------------------------------------|

\*Annual incidence was calculated by dividing the overall incidence by the study duration
