# Supplementary material for: Incidence and Prevalence of Neovascular Age-Related Macular Degeneration in France between 2008 and 2018: The LANDSCAPE Study
Source: PubMed Central journal article supplement — Ophthalmol Sci. 2022 Jan 22;2(1):100114. doi: 10.1016/j.xops.2022.100114 (PMC9562296; doi:10.1016/j.xops.2022.100114), 2022-01-22
Supplement: mmc2.pdf [file mmc2.pdf]

**Supplementary Table 2** Prevalence of AMD in the literature in Europe and USA (selected articles were published after the year 2000 and included >500 participants)

| Author, publication date                     | Country, date of data collection | Study design                                                                                           | Analyzed population                                                    | Prevalence (%) |                                  |                                                |
|----------------------------------------------|----------------------------------|--------------------------------------------------------------------------------------------------------|------------------------------------------------------------------------|----------------|----------------------------------|------------------------------------------------|
|                                              |                                  |                                                                                                        |                                                                        | Any AMD        | Late AMD<br>[age group in years] | Neovascular AMD<br>[age group in years]        |
| Delcourt <i>et al</i> 2010 <sup>22</sup>     | France<br>2006-2008              | Population aged > 73 years old<br>selected from electoral rolls                                        | 963 participants<br>Mean age: 79.8 years<br>Sex ratio: 38.1% men       | 28.1           | 4.8                              | 1.5<br>[73-79]=1.0<br>[≥80]=2.3                |
| Akuffo KO <i>et al.</i> , 2015 <sup>16</sup> | Ireland<br>2009 - 2011           | Volunteers from a population-representative sample of individuals aged ≥ 50 years<br>recruited by mail | 4751 participants<br>Mean age: 61.61 years old<br>Sex ratio: 45.7% men | 7.2            | 0.6                              | 0.3<br>[50-64]=0.1<br>[65-74]=0.2<br>[≥75]=1.0 |
| Cachulo M <i>et al.</i> , 2016 <sup>42</sup> | Portugal<br>2009-2013            | Population aged > 55 years old<br>recruited from a primary public healthcare system                    | 5996 participants<br>Mean age: 68.2 years old<br>Sex ratio: 43.7% men  | NA             | 1.16                             | 0.55                                           |

For: Ophthalmology Science

|                                               |                          |                                                                                                         |                                                                         |     |                          |                                                                                |
|-----------------------------------------------|--------------------------|---------------------------------------------------------------------------------------------------------|-------------------------------------------------------------------------|-----|--------------------------|--------------------------------------------------------------------------------|
| Colijn JM <i>et al.</i> , 2017 <sup>4</sup>   | Europe<br>1990 -<br>2013 | Meta-analysis (NA): population aged > 40 years old in 14 other studies                                  | 42080 participants<br>Mean age: 65-69 years old<br>Sex ratio: 44.2% men | NA  | [55-59]=0.1<br>[≥85]=9.8 | NA                                                                             |
| Erke MG <i>et al.</i> , 2012 <sup>13</sup>    | Norway<br>2007-<br>2008  | Volunteers from citizen aged > 65 years of Tromso city                                                  | 2631 participants<br>Mean age: 72-73 years old<br>Sex ratio: 42.5% men  | NA  | 3.5                      | 2.5<br>[65-69]=0.5<br>[70-74]=1.8<br>[75-79]=4.3<br>[80-87] = 7.5              |
| Jonasson F <i>et al.</i> , 2011 <sup>14</sup> | Iceland<br>2002-<br>2006 | Volunteer citizens from Reykjavik city born before 1937, participating in a cardiovascular cohort study | 5272 participants<br>Mean age: 76 years old<br>Sex ratio: 42.0% men     | NA  | 5.2                      | 3.3<br>[66-69]=0.6<br>[70-74]=1.0<br>[75-79]=2.4<br>[80-84]=6.1<br>[≥85] =11.4 |
| Klein R <i>et al.</i> , 2011 <sup>6</sup>     | USA<br>2005-<br>2008     | Sample of US citizens (civilian, noninstitutionalized) aged > 40 years old of the US                    | 5553 participants<br>Mean age: (≥40)<br>Sex ratio: 47.4% men            | 6.5 | 0.8                      | 0.3<br>[≥60]=0.9<br>[≥60 white]=1.0                                            |

For: Ophthalmology Science

|                                                |                                   |                                                                                                                                 |                                                                                  |             |                                                                                                                    |                                                                          |
|------------------------------------------------|-----------------------------------|---------------------------------------------------------------------------------------------------------------------------------|----------------------------------------------------------------------------------|-------------|--------------------------------------------------------------------------------------------------------------------|--------------------------------------------------------------------------|
| <p>Korb CA <i>et al.</i>, 2014<sup>7</sup></p> | <p>Germany<br/>2007-<br/>2008</p> | <p>Volunteers from population (35-74] years old drawn randomly from the local residents' registration of Rhine-Maine region</p> | <p>4340 participants<br/>Mean age: 55.5 years<br/>Sex ratio: 50.4% men</p>       | <p>NA</p>   | <p>0.2</p>                                                                                                         | <p>0.1</p>                                                               |
| <p>SEE Study Group, 2011<sup>41</sup></p>      | <p>Spain<br/>2010</p>             | <p>Volunteers from the general population aged &gt; 65 years randomly selected and contacted by mail and phone</p>              | <p>2132 patients<br/>Age range: 65-&gt;80 years old<br/>Sex ratio: 39.4% men</p> | <p>NA</p>   | <p>3.4</p>                                                                                                         | <p>1.9<br/>[65-69]=0.5<br/>[70-74]=1.4<br/>[75-79]=0.5<br/>[≥80]=4.4</p> |
| <p>Wong WL <i>et al.</i>, 2014<sup>5</sup></p> | <p>World<br/>Before<br/>2013</p>  | <p>Meta-analysis (NA) of population aged &gt; 45 years old</p>                                                                  | <p>129664 participants<br/>Age range: 45-85 years old<br/>Sex ratio: NA</p>      | <p>8.69</p> | <p>0.37<br/>Europe = 0.50<br/>[45-49]=0.05<br/>[50-59]=0.13<br/>[60-69]=0.42<br/>[70-79]=1.41<br/>[80-84]=3.25</p> | <p>NA</p>                                                                |
